# Supplementary material for: Poly(3,4-ethylenedioxyselenophene): effect of solvent and electrolyte on electrodeposition, optoelectronic and electrochromic properties
Source: Royal Society of Chemistry journal article supplement (doi:10.1039/d0ra01436b), 2020-01-01
Supplement: d0ra01436b1.pdf [file d0ra01436b1.pdf]

## Supporting Information

# Poly(3,4-ethylenedioxysephenone): Effect of Solvent and Electrolyte on Electrodeposition, Optoelectronic and Electrochromic Properties

Preeti Yadav<sup>a,b</sup>, Sheerin Naqvi<sup>a,b</sup>, Asit Patra<sup>a,b\*</sup>

<sup>a</sup>Photovoltaic Metrology Section, Advanced Materials & Device Metrology Division, CSIR-National Physical Laboratory, Dr. K. S. Krishnan Marg, New Delhi-110012, India

<sup>b</sup>Academy of Scientific and Innovative Research (AcSIR), Ghaziabad-201002, India

### Table of content

|                                                                     |              |
|---------------------------------------------------------------------|--------------|
| <b>1. Dielectric constant and viscosity values of solvents.....</b> | <b>S2</b>    |
| <b>2. Scan rates dependence plots of PEDOS.....</b>                 | <b>S2</b>    |
| <b>3. UV-Vis absorption spectrum of EDOS.....</b>                   | <b>S3</b>    |
| <b>4. UV-Vis absorption spectra of PEDOS films.....</b>             | <b>S3-S4</b> |
| <b>5. SEM images of PEDOS films.....</b>                            | <b>S4-S5</b> |
| <b>6. Reference.....</b>                                            | <b>S5</b>    |

Table S1. Dielectric constant and viscosity of solvents at 25°C<sup>1</sup>

| Solvent                  | Dielectric constant ( $\epsilon$ ) | Viscosity (mPa s) | Density(g/cm <sup>-3</sup> ) |
|--------------------------|------------------------------------|-------------------|------------------------------|
| Acetonitrile (MeCN)      | 37.50                              | 0.34              | 0.79                         |
| Propylene carbonate (PC) | 66.14                              | 2.5               | 1.20                         |

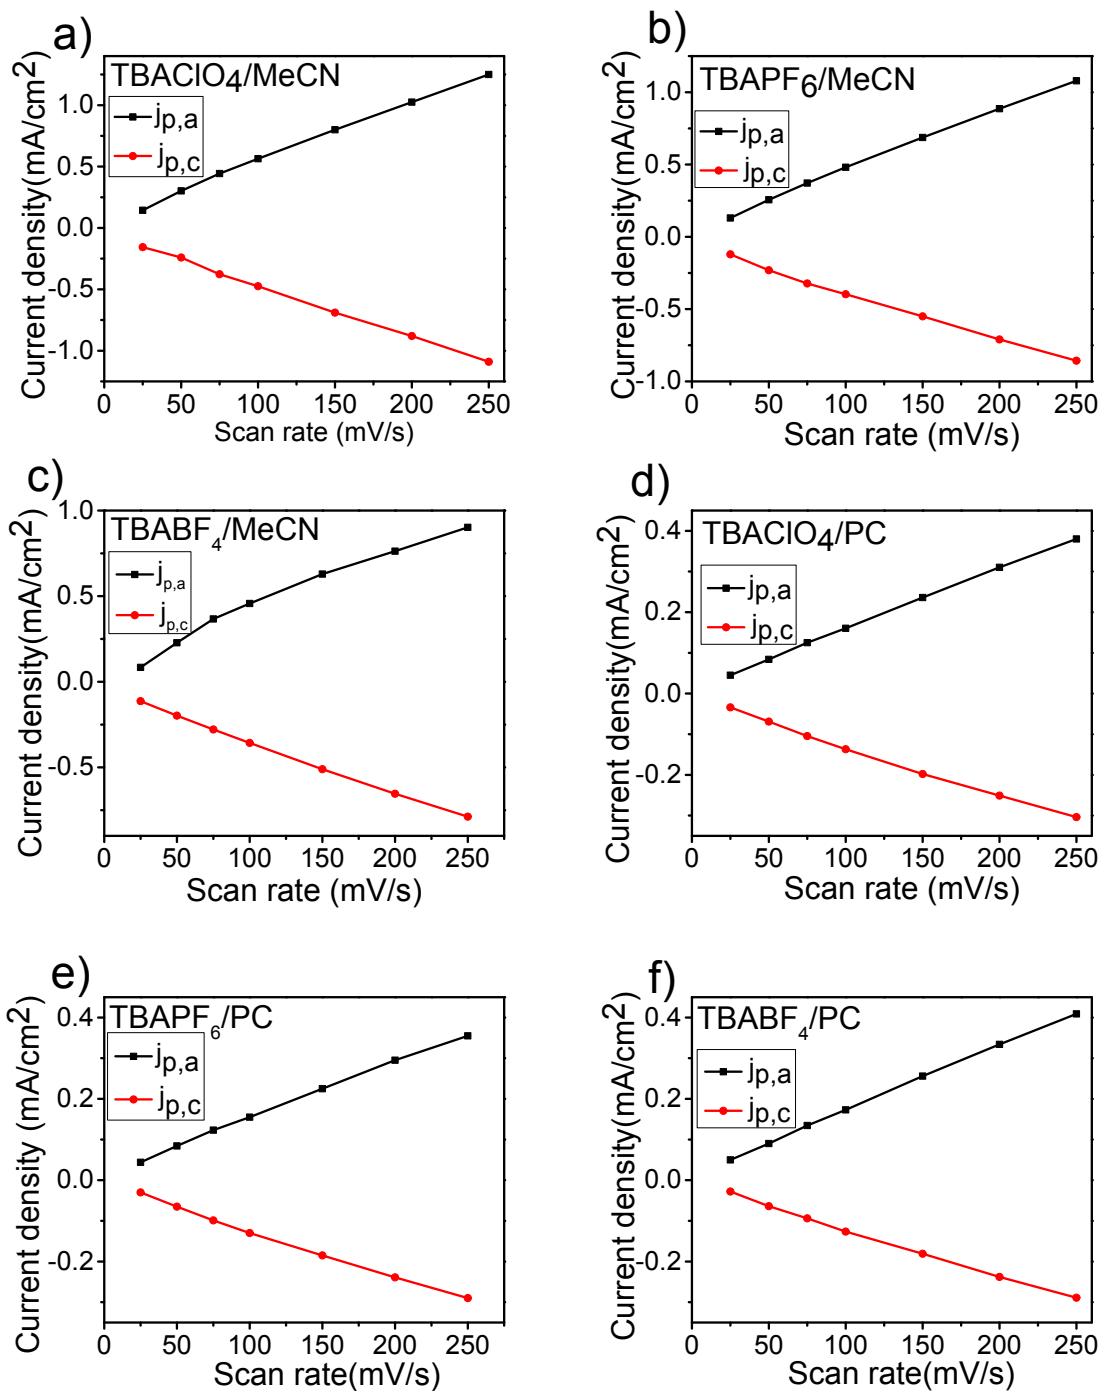

Figure S1. Plots of cathodic and anodic peak current densities versus scan rates of PEDOS films prepared in different solvent-electrolyte medium a) TBAClO<sub>4</sub>/MeCN, b) TBAPF<sub>6</sub>/MeCN, c) TBABF<sub>4</sub>/MeCN, d) TBAClO<sub>4</sub>/PC, e) TBAPF<sub>6</sub>/PC and f) TBABF<sub>4</sub>/PC.

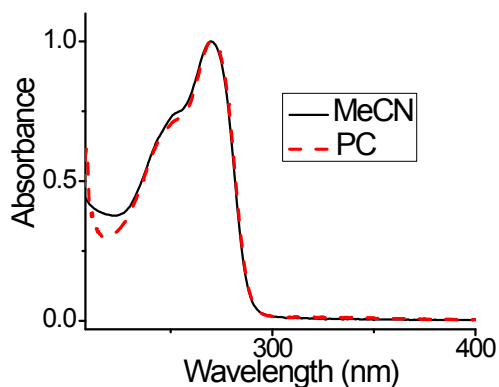

Figure S2. UV-vis absorption spectra of EDOS in acetonitrile and propylene carbonate.

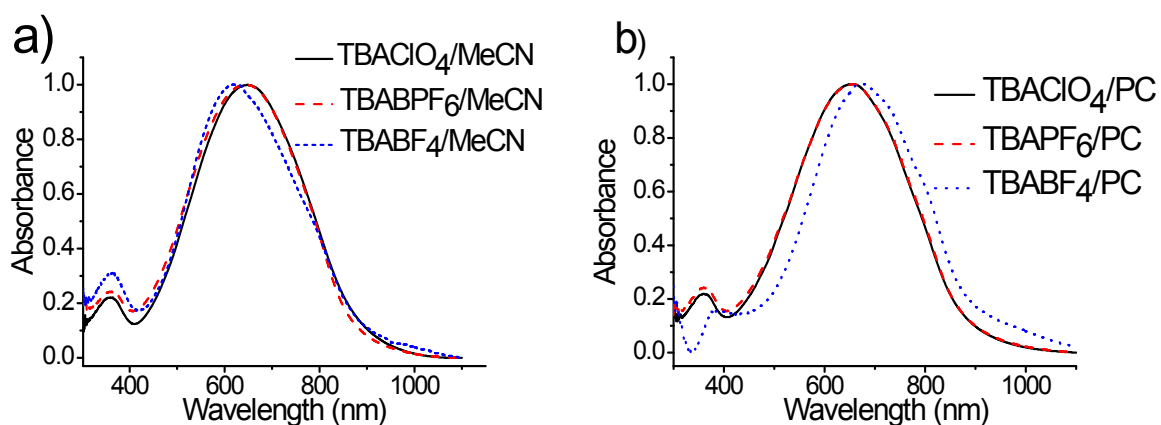

Figure S3. Normalized UV-vis-NIR spectra of PEDOS films a) MeCN and b) PC in neutral states (-0.9 V) recorded in same solvent-electrolyte media as used for electropolymerization.

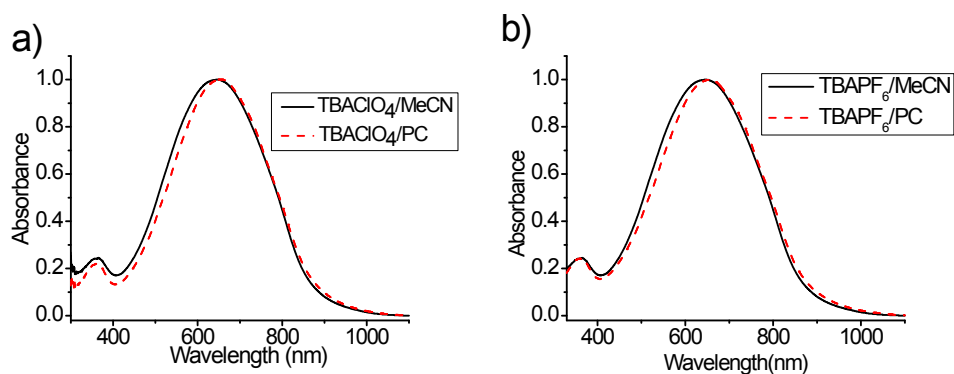

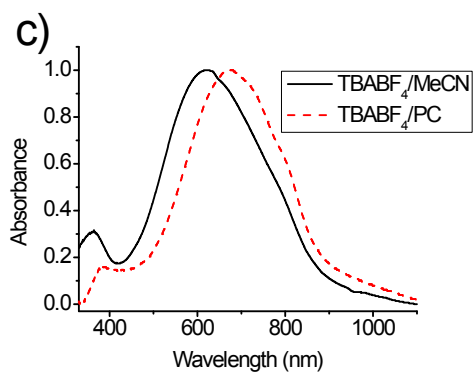

Figure S4. Normalized UV-vis-NIR spectra of PEDOS films prepared using a) TBAClO<sub>4</sub> and b) TBAPF<sub>6</sub> c) TBABF<sub>4</sub> in neutral states (-0.9 V) recorded in solvents MeCN and PC.

| Polymer prepared using    | Magnifications |       |
|---------------------------|----------------|-------|
|                           | 10000          | 20000 |
| TBAClO <sub>4</sub> /MeCN |                |       |
| TBAPF <sub>6</sub> /MeCN  |                |       |
| TBABF <sub>4</sub> /MeCN  |                |       |

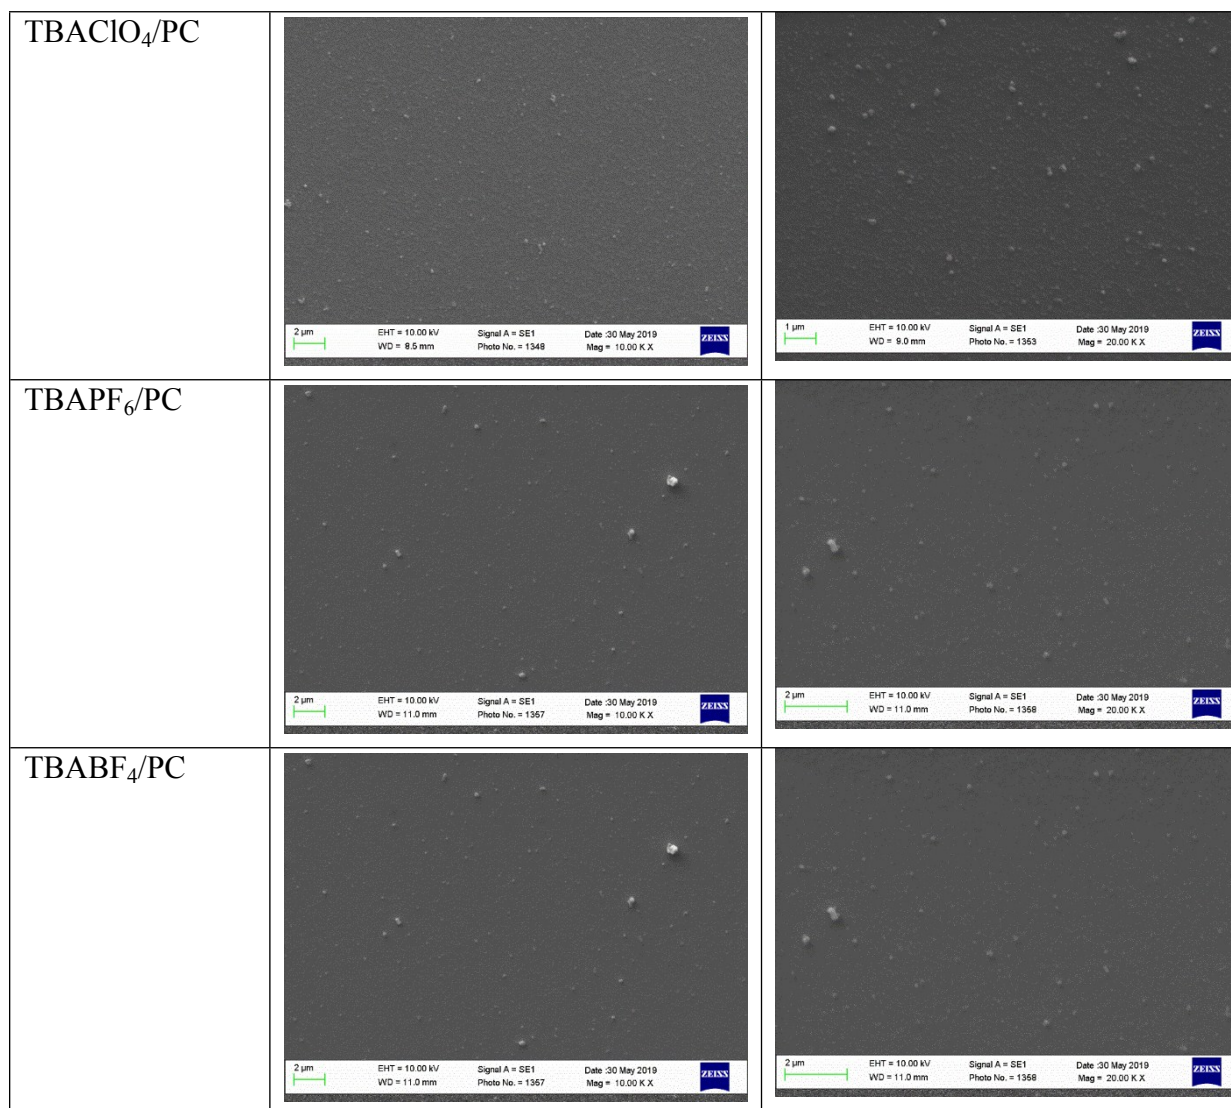

Figure S5. SEM images of PEDOS films prepared on ITO coated glass using repetitive cyclic voltammetry in different solvent-electrolyte media a) TBAClO<sub>4</sub>/MeCN, b) TBAPF<sub>6</sub>/MeCN, c) TBABF<sub>4</sub>/MeCN d) TBAClO<sub>4</sub>/PC e) TBAPF<sub>6</sub>/PC f) TBABF<sub>4</sub>/PC at scan rate of 100 mV/s. Magnification: 10000 and 20000 x. Concentration of supporting electrolyte is 0.1 M.

## Reference

1. S. Ming, Z. Feng, D. Mo, Z. Wang, K. Lin, B. Lu and J. Xu, *Phys.Chem. Chem. Phys.*, 2016, **18**, 5129-5138.
